# Supplementary material for: Early Childhood Junk Food Consumption, Severe Dental Caries, and Undernutrition: A Mixed-Methods Study from Mumbai, India
Source: PubMed Central journal article supplement (PMC7699964; doi:10.3390/ijerph17228629), 2020-11-20
Supplement: ijerph-17-08629-s001.pdf [file ijerph-17-08629-s001.pdf]

**Supplemental Table 1.** Bivariate Associations Between Junk Food Consumption, Deep Caries and Undernutrition.

|                                                   | BAZ           |                   |                |                  | HAZ           |           |                |           | WAZ           |                  |                |                  | HAZ or BAZ or WAZ |                  |                |                  |
|---------------------------------------------------|---------------|-------------------|----------------|------------------|---------------|-----------|----------------|-----------|---------------|------------------|----------------|------------------|-------------------|------------------|----------------|------------------|
|                                                   | Child Age < 3 |                   | Child age >= 3 |                  | Child Age < 3 |           | Child age >= 3 |           | Child Age < 3 |                  | Child age >= 3 |                  | Child Age < 3     |                  | Child age >= 3 |                  |
|                                                   | OR            | 95% CI            | OR             | 95% CI           | OR            | 95% CI    | OR             | 95% CI    | OR            | 95% CI           | OR             | 95% CI           | OR                | 95% CI           | OR             | 95% CI           |
| <b>Consumption of junk food and sugary drinks</b> |               |                   |                |                  |               |           |                |           |               |                  |                |                  |                   |                  |                |                  |
| <b>Salty junk food</b>                            |               |                   |                |                  |               |           |                |           |               |                  |                |                  |                   |                  |                |                  |
| 2-3 times per day vs rarely                       | 0.47          | 0.22-1.00         | 0.82           | 0.41-1.65        | 0.93          | 0.52-1.68 | 1.10           | 0.64-1.9  | <b>0.50</b>   | <b>0.26-0.95</b> | 0.92           | 0.53-1.6         | <b>0.48</b>       | <b>0.26-0.89</b> | 0.75           | 0.44-1.28        |
| Once a day vs rarely                              | 0.74          | 0.39-1.43         | 1.36           | 0.73-2.57        | 0.73          | 0.42-1.28 | 0.96           | 0.57-1.61 | 0.63          | 0.35-1.13        | 1.07           | 0.63-1.81        | <b>0.49</b>       | <b>0.27-0.88</b> | 0.87           | 0.53-1.45        |
| Weekly vs rarely                                  | 0.99          | 0.48-2.03         | 1.33           | 0.68-2.58        | 0.65          | 0.35-1.24 | 1.35           | 0.79-2.34 | 0.53          | 0.27-1.06        | 1.51           | 0.87-2.6         | 0.56              | 0.29-1.09        | 1.17           | 0.68-2.00        |
| <b>Sweet snacks</b>                               |               |                   |                |                  |               |           |                |           |               |                  |                |                  |                   |                  |                |                  |
| 2-3 times per day vs rarely                       | <b>0.35</b>   | <b>0.16-0.76</b>  | 0.73           | 0.37-1.46        | 1.48          | 0.83-2.63 | 0.60           | 0.35-1.03 | 0.82          | 0.44-1.52        | 0.75           | 0.43-1.28        | 0.83              | 0.46-1.50        | <b>0.50</b>    | <b>0.29-0.84</b> |
| Once a day vs rarely                              | 0.50          | 0.24-1.05         | 1.40           | 0.71-2.75        | 1.44          | 0.79-2.62 | 0.76           | 0.44-1.33 | 0.59          | 0.3-1.17         | 1.24           | 0.71-2.17        | 0.67              | 0.36-1.23        | 0.83           | 0.47-1.45        |
| Weekly vs rarely                                  | 0.65          | 0.34-1.25         | 1.41           | 0.73-2.74        | 1.05          | 0.59-1.85 | 1.05           | 0.61-1.8  | 0.88          | 0.48-1.6         | 1.20           | 0.7-2.09         | 0.77              | 0.43-1.37        | 0.95           | 0.55-1.63        |
| <b>Sugar-sweetened beverages</b>                  |               |                   |                |                  |               |           |                |           |               |                  |                |                  |                   |                  |                |                  |
| 2-3 times per day vs rarely                       | 1.10          | 0.22-5.58         | 0.93           | 0.34-2.54        | 0.17          | 0.02-1.41 | 0.84           | 0.36-1.95 | 0.32          | 0.04-2.64        | 0.99           | 0.44-2.27        | 0.21              | 0.04-1.07        | 0.74           | 0.33-1.67        |
| Once a day vs rarely                              | 0.66          | 0.14-3.09         | 0.58           | 0.22-1.53        | 1.68          | 0.52-5.42 | 0.63           | 0.3-1.31  | 3.13          | 0.97-10.14       | 0.63           | 0.3-1.31         | 1.27              | 0.37-4.33        | 0.68           | 0.35-1.34        |
| Weekly vs rarely                                  | 0.54          | 0.22-1.32         | 1.06           | 0.66-1.70        | 1.38          | 0.72-2.63 | 0.88           | 0.59-1.31 | 1.08          | 0.54-2.15        | 0.82           | 0.55-1.24        | 0.97              | 0.51-1.88        | 0.82           | 0.55-1.21        |
| <b>Sugary tea</b>                                 |               |                   |                |                  |               |           |                |           |               |                  |                |                  |                   |                  |                |                  |
| 2-3 times per day vs rarely                       | 0.42          | 0.02-1.12         | 1.00           | 0.47-2.11        | 1.47          | 0.58-3.72 | 0.99           | 0.53-1.86 | 1.58          | 0.59-4.21        | 0.88           | 0.44-1.75        | 0.87              | 0.34-2.21        | 1.15           | 0.64-2.07        |
| Once a day vs rarely                              | 0.68          | 0.32-1.42         | <b>1.82</b>    | <b>1.04-3.19</b> | 1.70          | 0.93-3.11 | 1.55           | 0.96-2.52 | 1.17          | 0.6-2.30         | <b>2.75</b>    | <b>1.65-4.57</b> | 1.28              | 0.69-2.4         | <b>2.41</b>    | <b>1.5-3.86</b>  |
| Weekly vs rarely                                  | 1.00          | 0.30-3.31         | 0.72           | 0.23-2.30        | 2.21          | 0.75-6.48 | 1.17           | 0.49-2.8  | 0.73          | 0.2-2.72         | <b>2.60</b>    | <b>1.1-6.13</b>  | 1.96              | 0.6-6.4          | 1.38           | 0.6-3.17         |
| <b>Severe dental caries</b>                       |               |                   |                |                  |               |           |                |           |               |                  |                |                  |                   |                  |                |                  |
| <b>Deep Caries</b>                                |               |                   |                |                  |               |           |                |           |               |                  |                |                  |                   |                  |                |                  |
| Has deep caries vs does not                       | 1.03          | 0.21-5.06         | 1.43           | 0.94-2.18        | 0.14          | 0.02-1.14 | 0.72           | 0.50-1.04 | NA*           | NA*              | 1.18           | 0.82-1.70        | 1.03              | 0.21-5.06        | 0.32           | 0.08-1.31        |
| <b>Deep Caries and Mouth pain</b>                 |               |                   |                |                  |               |           |                |           |               |                  |                |                  |                   |                  |                |                  |
| Has deep caries and mouth pain vs does not        | <b>1.20</b>   | <b>0.12-11.72</b> | 1.44           | 0.90-2.33        | NA*           | NA*       | 0.74           | 0.48-1.14 | NA*           | NA*              | 1.23           | 0.81-1.86        | 0.22              | 0.02-2.11        | 1.06           | 0.70-1.60        |

\*Sample size too small to estimate association
